# Supplementary material for: Article 3: 1-year impact of supervision, performance assessment, and recognition strategy (SPARS) on prescribing and dispensing quality in Ugandan health facilities
Source: PubMed Central journal article supplement (PMC7461332; doi:10.1186/s40545-020-00248-w), 2020-09-01
Supplement: 40545_2020_248_MOESM3_ESM.pdf [file 40545_2020_248_MOESM3_ESM.pdf]

Additional file 3: Percentage of facilities with complete measures at first visit, last visit, change from first to last visit, and complete at both first and last visits

| AMU measure                                                     | Type * | Item completeness |                |            |                 |
|-----------------------------------------------------------------|--------|-------------------|----------------|------------|-----------------|
|                                                                 |        | First visit (%)   | Last visit (%) | Change (%) | Both visits (%) |
| <b>Dispensing quality</b>                                       |        |                   |                |            |                 |
| 1. % acceptable dispensing time                                 | B      | 98%               | 99%            | 1%         | 97%             |
| 2. % of facilities with dispensing envelopes                    | R      | 100%              | 100%           | 0%         | 100%            |
| 3. % of facilities with appropriate and clean containers        | R      | 100%              | 100%           | 0          | 100%            |
| 4. % of facilities with spatula or spoon                        | R      | 99.9%             | 100.0%         | 0%         | 100%            |
| 5. % of facilities with tablet counting tray or similar         | R      | 99.9%             | 100.0%         | 0%         | 100%            |
| 6. % of facilities with tablets counted using spatula or gloves | R      | 99.9%             | 100.0%         | 0%         | 100%            |
| 7. % of facilities with graduated measuring cylinder            | R      | 99.9%             | 100.0%         | 0%         | 100%            |
| 8. % of facilities with chairs/benches in dispensing area       | R      | 99.8%             | 99.8%          | 0%         | 100%            |
| 9. % of facilities with privacy during dispensing               | R      | 99.8%             | 99.9%          | 0%         | 100%            |
| 10. % of facilities where patients can wash hands               | R      | 99.8%             | 99.9%          | 0%         | 100%            |
| 11. % of facilities with drinking water accessible to patients  | R      | 99.8%             | 99.9%          | 0%         | 100%            |
| 12. % of patients with all prescribed medicines dispensed       | B      | 96.6%             | 98.0%          | 1%         | 95%             |
| 13. % of patients knowing dose of medicines to take             | B      | 96.2%             | 98.0%          | 2%         | 95%             |
| 14. % of patients knowing how frequently to take medicines      | B      | 96.2%             | 98.0%          | 2%         | 95%             |
| 15. % of patients knowing how long to take the medicines        | B      | 96.2%             | 98.0%          | 2%         | 95%             |
| 16. % of patients knowing why they got the medicines            | B      | 96.2%             | 98.0%          | 2%         | 95%             |
| 17. % of medicines labelled with medicines name                 | B      | 96.2%             | 98.0%          | 2%         | 95%             |
| 18. % of medicines labelled with strength                       | B      | 96.8%             | 97.8%          | 1%         | 95%             |
| 19. % of medicines labelled with quantity                       | B      | 96.8%             | 97.8%          | 1%         | 95%             |
| 20. % of medicines labelled with date                           | B      | 96.8%             | 97.8%          | 1%         | 95%             |
| 21. % of medicines labelled with dose                           | B      | 96.8%             | 97.8%          | 1%         | 95%             |
| 22. % of medicines labelled with patient name                   | B      | 96.8%             | 97.8%          | 1%         | 95%             |
| 23. % of medicines labelled with facility name                  | B      | 96.8%             | 97.7%          | 1%         | 95%             |
| 24. % with all prescribed amoxicillin dispensed                 | R      | 50.6%             | 76.4%          | 26%        | 42%             |
| 25. % with all prescribed cotrimoxazole dispensed               | R      | 55.2%             | 84.7%          | 29%        | 50%             |
| <b>Prescribing quality</b>                                      |        |                   |                |            |                 |
| 26. % of prescriptions with date recorded                       | B      | 95.4%             | 97.8%          | 2%         | 94%             |
| 27. % of prescriptions with location of treatment recorded      | B      | 95.4%             | 97.8%          | 2%         | 94%             |
| 28. % of prescriptions with diagnosis recorded                  | B      | 95.4%             | 97.8%          | 2%         | 94%             |
| 29. % of prescriptions with medicines name recorded             | B      | 95.4%             | 97.8%          | 2%         | 94%             |
| 30. % of prescriptions with prescriber name recorded            | B      | 95.3%             | 97.7%          | 2%         | 94%             |
| 31. % of prescriptions with amount prescribed recorded          | B      | 95.4%             | 97.7%          | 2%         | 94%             |
| 32. % of prescriptions with amount dispensed recorded           | B      | 95.1%             | 97.4%          | 2%         | 93%             |
| 33. Average # of medicines prescribed                           | B      | 96.6%             | 98.0%          | 1%         | 94%             |
| 34. % of medicines prescribed by generic name                   | B      | 96.6%             | 98.0%          | 1%         | 95%             |
| 35. % of patients with no antibiotic prescribed                 | B      | 99.0%             | 99.5%          | 0%         | 99%             |
| 36. % of patients with no injection prescribed                  | B      | 99.0%             | 99.5%          | 0%         | 99%             |
| 37. % of patients with diagnosis recorded                       | B      | 98.7%             | 98.9%          | 0%         | 98%             |
| 38. % of medicines on essential medicines list of Uganda        | B      | 98.4%             | 98.9%          | 1%         | 97%             |
| 39. % of patients prescribed oral rehydration salt (ORS)        | B      | 86.4%             | 81.8%          | -5%        | 74%             |
| 40. % of patients prescribed ORS and no antibiotics             | B      | 86.4%             | 80.9%          | -5%        | 73%             |
| 41. % of patients prescribed ORS and no anti-diarrhoeal         | B      | 86.3%             | 81.1%          | -5%        | 73%             |
| 42. % of patients prescribed ORS and zinc                       | B      | 73.1%             | 80.1%          | 7%         | 62%             |

| AMU measure                                                     | Type * | Item completeness |                |            |                 |
|-----------------------------------------------------------------|--------|-------------------|----------------|------------|-----------------|
|                                                                 |        | First visit (%)   | Last visit (%) | Change (%) | Both visits (%) |
| 43. % of patients prescribed ORS and no antispasmodic           | B      | 86.3%             | 80.3%          | -6%        | 72%             |
| 44. % of patients with appropriate prescription for diarrhoea   | B      | 86.3%             | 81.8%          | -5%        | 74%             |
| 45. % of patients prescribed no antibiotics                     | B      | 94.7%             | 94.5%          | 0%         | 90%             |
| 46. % of patients prescribed antipyretic/analgesic              | B      | 94.7%             | 95.1%          | 0%         | 91%             |
| 47. % of patients prescribed cough or cold medicines            | B      | 94.7%             | 94.7%          | 0%         | 91%             |
| 48. % of patients with appropriate prescription for cough/cold  | B      | 83.0%             | 84.3%          | 1%         | 72%             |
| 49. % of facilities with Rapid Diagnostic Tests (RDT) available | R      | 99.2%             | 99.2%          | 0%         | 99%             |
| 50. % of facilities with functional lab for malaria testing     | R      | 86.9%             | 66.1%          | -21%       | 63%             |
| 51. % of patients with malaria RDT or smear conducted           | B      | 81.8%             | 84.2%          | 2%         | 78%             |
| 52. % of patients receiving artemisinin combination therapy     | B      | 96.6%             | 98.4%          | 2%         | 95%             |
| 53. % of patients receiving quinine tablet                      | B      | 96.3%             | 97.2%          | 1%         | 94%             |
| 54. % of patients receiving no pyrimethamine/sulfadoxine SP     | B      | 96.3%             | 97.0%          | 1%         | 94%             |
| 55. % of patients receiving no antibiotics                      | B      | 96.3%             | 97.3%          | 1%         | 94%             |
| 56. % of patients receiving paracetamol/antipyretics            | B      | 96.3%             | 98.4%          | 2%         | 95%             |
| 57. % patients with appropriate treatment for malaria           | B      | 96.6%             | 98.5%          | 2%         | 95%             |
