# Supplementary material for: Article 3: 1-year impact of supervision, performance assessment, and recognition strategy (SPARS) on prescribing and dispensing quality in Ugandan health facilities
Source: PubMed Central journal article supplement (PMC7461332; doi:10.1186/s40545-020-00248-w), 2020-09-01
Supplement: 40545_2020_248_MOESM4_ESM.pdf [file 40545_2020_248_MOESM4_ESM.pdf]

Additional file 4: Characteristics of health facilities included in the analysis, overall and by level of care

| Study facilities                           | Total |     | HC2 |    | HC3 |    | HC4/hospital |    | $\chi^2$ |
|--------------------------------------------|-------|-----|-----|----|-----|----|--------------|----|----------|
|                                            | No.   | %   | No. | %  | No. | %  | No.          | %  | p-value  |
|                                            | 1222  | 100 | 681 | 56 | 416 | 34 | 125          | 10 |          |
| Region                                     |       |     |     |    |     |    |              |    |          |
| Central                                    | 250   | 21  | 133 | 20 | 92  | 22 | 25           | 20 | 0.343    |
| Western                                    | 421   | 35  | 224 | 33 | 145 | 35 | 52           | 42 |          |
| Eastern                                    | 379   | 31  | 226 | 33 | 118 | 28 | 35           | 28 |          |
| Northern                                   | 172   | 14  | 98  | 14 | 61  | 15 | 13           | 10 |          |
| Ownership                                  |       |     |     |    |     |    |              |    |          |
| Government                                 | 1039  | 85  | 596 | 88 | 349 | 84 | 94           | 75 | 0.002    |
| PNFP                                       | 183   | 15  | 85  | 13 | 67  | 16 | 31           | 25 |          |
| Year of initial visit                      |       |     |     |    |     |    |              |    |          |
| 2011                                       | 753   | 62  | 368 | 54 | 289 | 70 | 96           | 77 | <0.001   |
| 2012                                       | 406   | 33  | 263 | 39 | 117 | 28 | 26           | 21 |          |
| 2013                                       | 63    | 5   | 50  | 7  | 10  | 2  | 3            | 2  |          |
| Number of visits in first year             |       |     |     |    |     |    |              |    |          |
| 2                                          | 328   | 27  | 184 | 27 | 115 | 28 | 29           | 23 |          |
| 3                                          | 334   | 27  | 176 | 26 | 115 | 28 | 43           | 34 |          |
| 4                                          | 323   | 26  | 180 | 26 | 108 | 26 | 35           | 28 |          |
| 5                                          | 201   | 16  | 122 | 18 | 62  | 15 | 17           | 14 |          |
| 6                                          | 35    | 3   | 19  | 3  | 15  | 4  | 1            | 1  |          |
| 7                                          | 1     | 0   | 0   | 0  | 1   | 0  | 0            | 0  |          |
| Health workers supervised at initial visit |       |     |     |    |     |    |              |    |          |
| One                                        | 280   | 23  | 223 | 33 | 45  | 11 | 12           | 10 | <0.001   |
| More than one                              | 942   | 77  | 458 | 67 | 371 | 89 | 113          | 90 |          |
| MMS supervising during initial visit       |       |     |     |    |     |    |              |    |          |
| One                                        | 957   | 78  | 603 | 89 | 292 | 70 | 62           | 50 | <0.001   |
| More than one                              | 265   | 22  | 78  | 12 | 124 | 30 | 63           | 50 |          |
| Designated MMS supervised initial visit*   |       |     |     |    |     |    |              |    |          |
| No                                         | 394   | 32  | 208 | 31 | 150 | 36 | 36           | 29 | 0.118    |
| Yes                                        | 828   | 68  | 473 | 69 | 266 | 64 | 89           | 71 |          |

\*Designated MMS is the MMS assigned to a facility who was responsible for a majority of visits
