# Supplementary material for: Article 3: 1-year impact of supervision, performance assessment, and recognition strategy (SPARS) on prescribing and dispensing quality in Ugandan health facilities
Source: PubMed Central journal article supplement (PMC7461332; doi:10.1186/s40545-020-00248-w), 2020-09-01
Supplement: 40545_2020_248_MOESM5_ESM.pdf [file 40545_2020_248_MOESM5_ESM.pdf]

Additional file 5: Characteristics of medicines management supervisors, overall and for the subgroup responding to a survey of their experience

| Characteristics       | No. | %    |
|-----------------------|-----|------|
| MMS study total       | 148 | 100  |
| Gender                |     |      |
| Male                  | 124 | 84   |
| Female                | 24  | 16   |
| Level                 |     |      |
| District MMS          | 53  | 36   |
| Sub district MMS      | 95  | 64   |
| Regions               |     |      |
| Central               | 31  | 21.0 |
| Western               | 56  | 37.8 |
| Eastern               | 41  | 27.7 |
| Northern              | 20  | 13.5 |
| Facilities supervised |     |      |
| 1-10                  | 81  | 54.7 |
| 11-15                 | 47  | 31.7 |
| 16+                   | 20  | 13.6 |
| Professional training |     |      |
| Clinical officer      | 87  | 59   |
| Pharmacist/dispenser  | 15  | 10   |
| Nurse                 | 36  | 24   |
| Supplies officer      | 10  | 7    |

| Characteristics                                                          | No. | %  |
|--------------------------------------------------------------------------|-----|----|
| MMS completing 2013 survey                                               | 111 | 75 |
| Age group                                                                |     |    |
| 26-35                                                                    | 37  | 34 |
| 36-45                                                                    | 46  | 42 |
| 46+                                                                      | 26  | 24 |
| Highest level of education                                               |     |    |
| Secondary/diploma/other                                                  | 92  | 83 |
| Bachelors/Master's degree                                                | 19  | 17 |
| Number of years of work experience                                       |     |    |
| 0-9                                                                      | 45  | 40 |
| 10+                                                                      | 66  | 60 |
| Frequency of meetings with DHO                                           |     |    |
| Monthly/weekly                                                           | 60  | 54 |
| Quarterly/semi-annually                                                  | 24  | 22 |
| Irregularly/other                                                        | 27  | 24 |
| Received feedback from DHO about MMS report                              |     |    |
| No                                                                       | 16  | 15 |
| Yes                                                                      | 92  | 85 |
| Sufficient time during visits to provide adequate supportive supervision |     |    |
| No                                                                       | 38  | 35 |
| Yes                                                                      | 71  | 65 |
| Health workers respond well to supervision                               |     |    |
| Some of them                                                             | 40  | 37 |
| Most/all of them                                                         | 68  | 63 |
